# Supplementary material for: A theoretical insight into excited-state decay and proton transfer ofp-nitrophenylphenol in the gas phase and methanol solution
Source: Royal Society of Chemistry journal article supplement (doi:10.1039/d2cp02452g), 2022-01-01
Supplement: d2cp02452g1.pdf [file d2cp02452g1.pdf]

# Supporting Information for a Theoretical Insight into Excited-State Decay and Proton Transfer of *p*-Nitrophenylphenol in the Gas Phase and Methanol Solution

Xiu-Fang Tang<sup>1†</sup>, Pei-Ke Jia<sup>1†</sup>, Yanying Zhao<sup>2</sup>, Jiadan Xue<sup>2\*</sup>, Ganglong Cui<sup>3</sup>, and Bin-Bin Xie<sup>1\*</sup>

1) *Hangzhou Institute of Advanced Studies, Zhejiang Normal University, 1108 Gengwen Road, Hangzhou 311231, Zhejiang, P. R. China*

2) *Department of Chemistry, Zhejiang Sci-Tech University, Hangzhou 310018, Zhejiang, P.R. China*

3) *Key Laboratory of Theoretical and Computational Photochemistry, Ministry of Education College of Chemistry, Beijing Normal University, Beijing 100875, P. R. China*

---

\*Author to whom correspondence should be addressed. Email: [jennixue@zstu.edu.cn](mailto:jennixue@zstu.edu.cn); [binbinxie@zjnu.edu.cn](mailto:binbinxie@zjnu.edu.cn).

## **Table of Contents**

1. UV-vis Absorption Spectra of NO<sub>2</sub>-Bp-OH in Different Solvents
2. Experimental and Theoretical Details for Choosing the Number of Methanol
3. Active Spaces for NO<sub>2</sub>-Bp-OH in the Gas Phase and Methanol Solution
4. The Minima and Intersection Structures of NO<sub>2</sub>-Bp-OH in the Gas Phase
5. Excited-State Decay Paths of NO<sub>2</sub>-Bp-OH in the Gas Phase
6. Cartesian Coordinates for Critical Structures

## 1. UV-vis Absorption Spectra of NO<sub>2</sub>-Bp-OH in Different Solvents

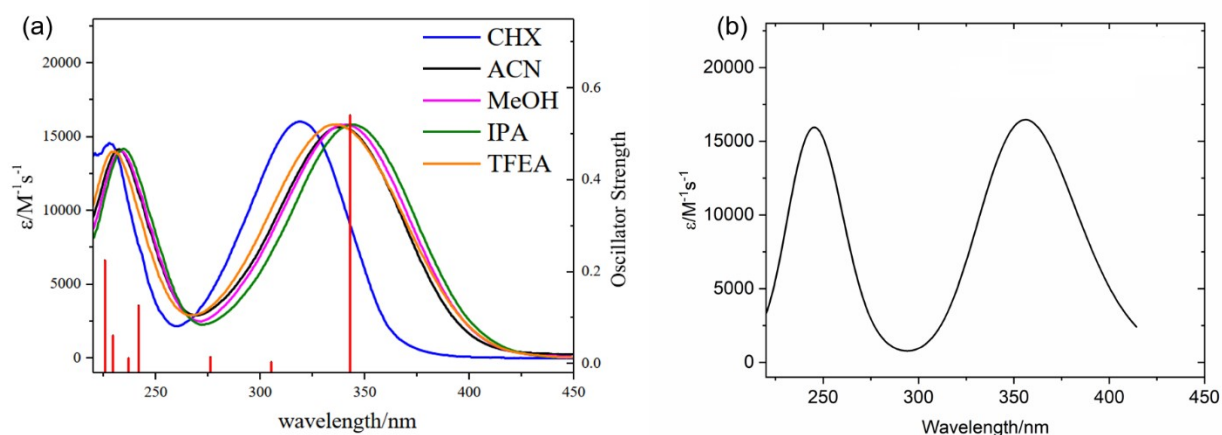

**Figure S1.** UV-vis absorption spectra of NO<sub>2</sub>-Bp-OH in different solvents, where CHX, CAN, MeOH, IPA and TFEA denote cyclohexane, acetonitrile, methanol, isopropanol and 2,2,2-trifluoroethanol, respectively (a); the simulated absorption spectrum for the NO<sub>2</sub>-Bp-OH system (b).

Table S1. The simulated absorption spectrum (nm) and fitted molar extinction coefficients (mol<sup>-1</sup>s<sup>-1</sup>) of NO<sub>2</sub>-Bp-OH in the lowest excited singlet state.

| States         | Simulated spectrum | Experiment spectrum |
|----------------|--------------------|---------------------|
| S <sub>1</sub> | 356.3 [16461]      | 339.8 [15805]       |

## 2. Experimental and Theoretical Details for Choosing the Number of Methanol

Alcohol, like water, is an amphiprotic solvent, but with only one hydrogen bond donating site. In contrast to water, alcohol's hydrogen bond typically takes the form of a chain. To accurately describe the relationship between the pseudo-first-order decay rate constant and the methanol concentration (see Fig. S2), the following equations are used:

$$k = k_0 + k_M[\text{MeOH}]^n \quad (1)$$

$$\log(k - k_0) = \log(k_M) + n \cdot \log[\text{MeOH}] \quad (2)$$

where  $k$  and  $k_0$  are the observation rate constants in the presence and absence of methanol, respectively.

The rate constant for the reaction of  ${}^3\text{NO}_2\text{-Bp-OH}$  with methanol is given by  $k_M$ . Eq.(2) is obtained by performing the logarithm transformation on two sides of Eq.(1). The slope value of  $n=3.0\pm 0.18$  is obtained by fitting the plot of the logarithm of  $k-k_0$  vs. the logarithm of methanol concentration with a linear function. The result of  $n=3$  suggests that the methanol trimer is required to quench  ${}^3\text{NO}_2\text{-Bp-OH}$ .

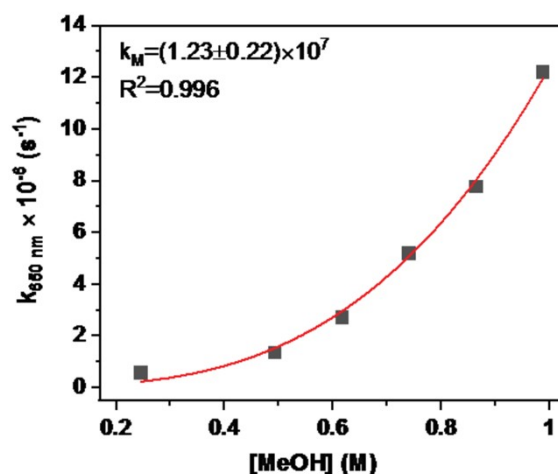

**Figure S2.** The pseudo-first-order decay time constants (solid squares) obtained by fitting the 650 nm kinetics with a single exponential function versus methanol concentrations, and the fitting curve (red curve) obtained with the equation  $k = k_0 + k_M[\text{MeOH}]^3$ .

Moreover, the potential energy surfaces of methanol oligomer assisted deprotonation in  ${}^3\text{NO}_2\text{-Bp-OH}$  are simulated using theoretical calculations, as shown in Fig. S3. The deprotonation barrier can be significantly reduced by increasing the number of methanol molecules around the hydroxyl group of  ${}^3\text{NO}_2\text{-Bp-OH}$ , and it is reduced to 3.7 kcal/mol in the methanol trimer structure. As the O-H distance in  ${}^3\text{NO}_2\text{-Bp-OH}$  increases, the energy surfaces of a single and two methanol molecules continue to grow, while the energy surface of three, four, and five methanol molecules exhibits minima. The energy barrier is slightly lower for four and five methanol molecules than that for three methanol molecules. This comes as no surprise given that the larger the cluster size, the more stable the structure. The greater the number of methanol molecules, the easier it is to deprotonate and stabilize the proton, but three-methanol is the critical size.

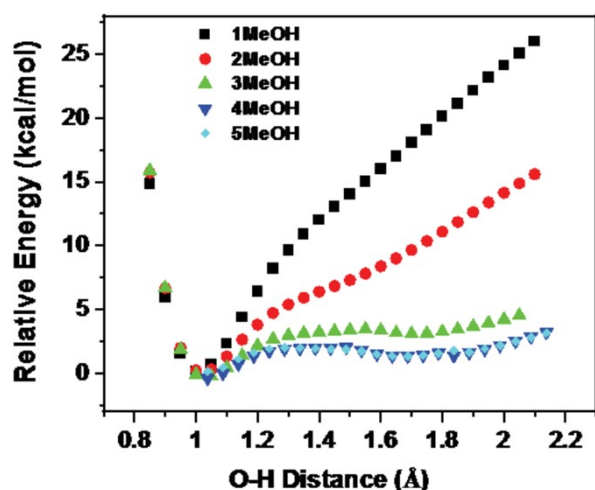

**Figure S3.** Potential energy curves of the  $T_1$  state  $\text{NO}_2\text{-Bp-OH}\cdots (\text{MeOH})_n$  ( $n=1-5$ ) hydrogen-bonded complexes in acetonitrile, obtained from the relaxed scans along the O-H (in  $\text{NO}_2\text{-Bp-OH}$ ) stretching

coordinate (step length=0.05 Å). The relative energy values are calculated in comparison to the corresponding hydrogen-bonded complexes in the S<sub>0</sub> state.

### 3. Active Spaces for NO<sub>2</sub>-Bp-OH in the Gas Phase and Methanol Solution

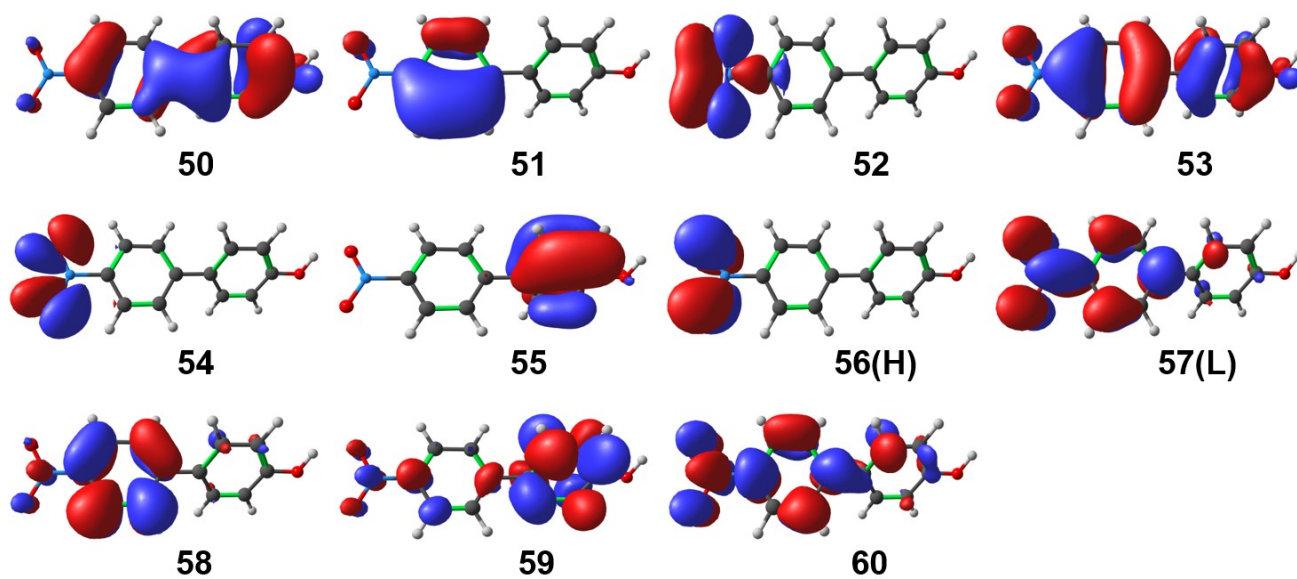

**Figure S4.** Molecular orbitals of NO<sub>2</sub>-Bp-OH in the gas phase with the SA8-CASSCF and MS-CASPT2 computations.

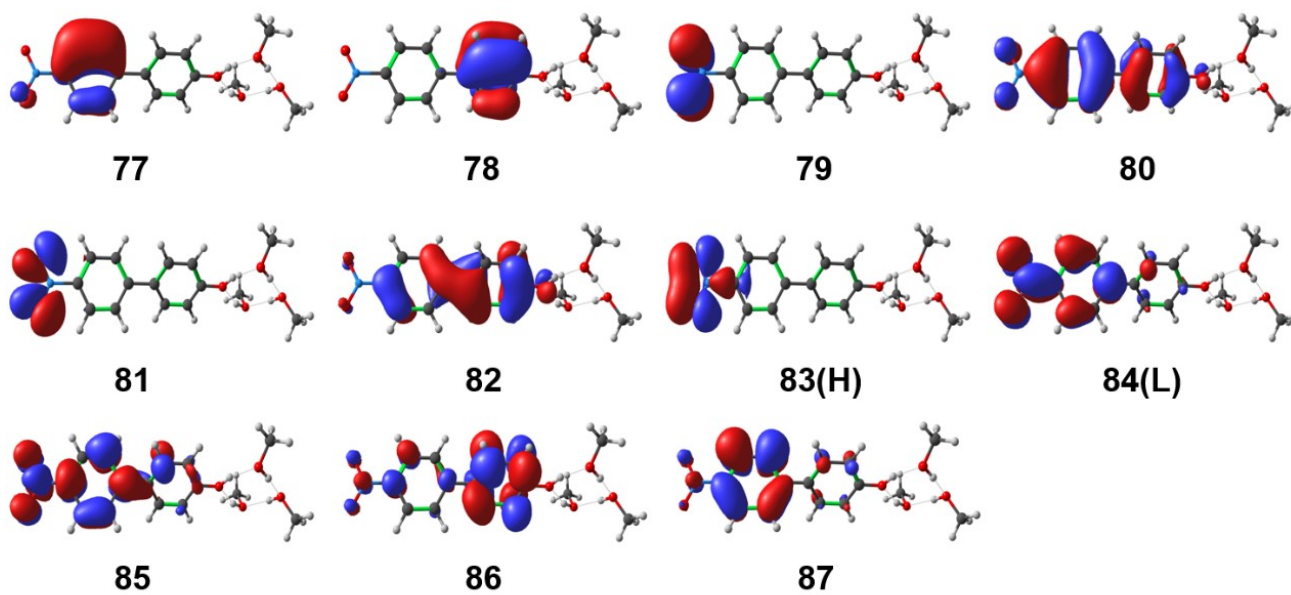

**Figure S5.** Molecular orbitals of NO<sub>2</sub>-Bp-OH-methanol complex in methanol solution with the QM(SA8-CASSCF)/MM and QM(MS-CASPT2)/MM computations.



#### 4. The Minima and Intersection Structures of NO<sub>2</sub>-Bp-OH in the Gas Phase

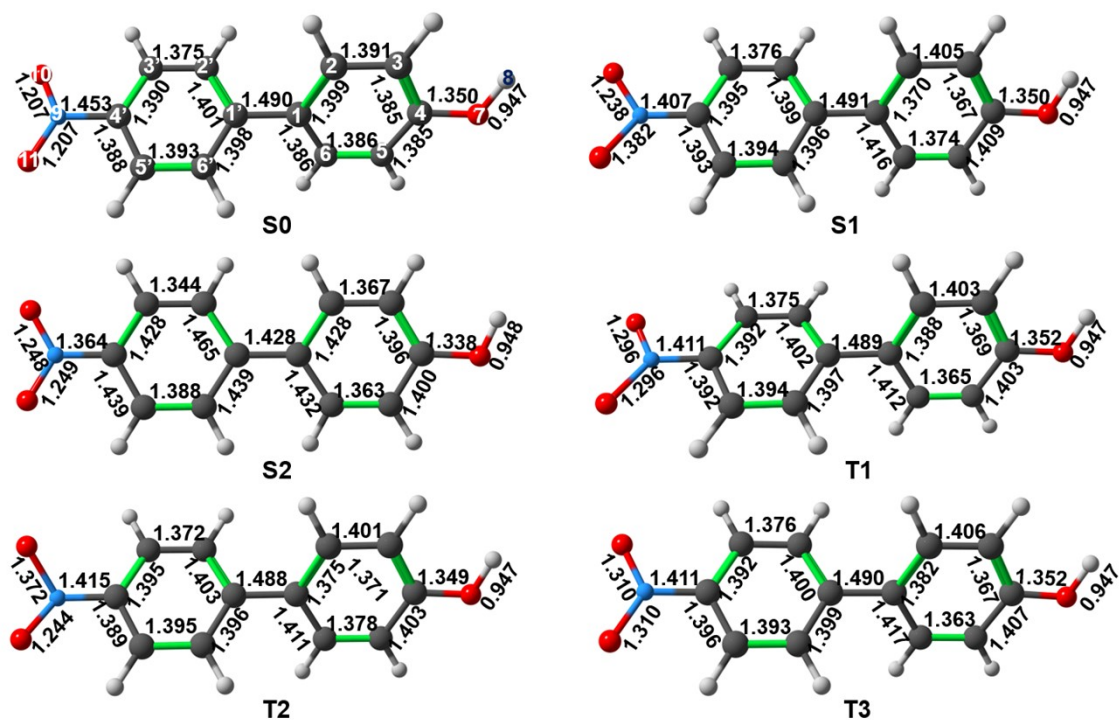

**Figure S6.** CASSCF optimized minimum-energy structures in the lowest six electronically singlet and triplet states in the gas phase together with the key bond lengths in (Å) and an atom-labeling scheme in S0.

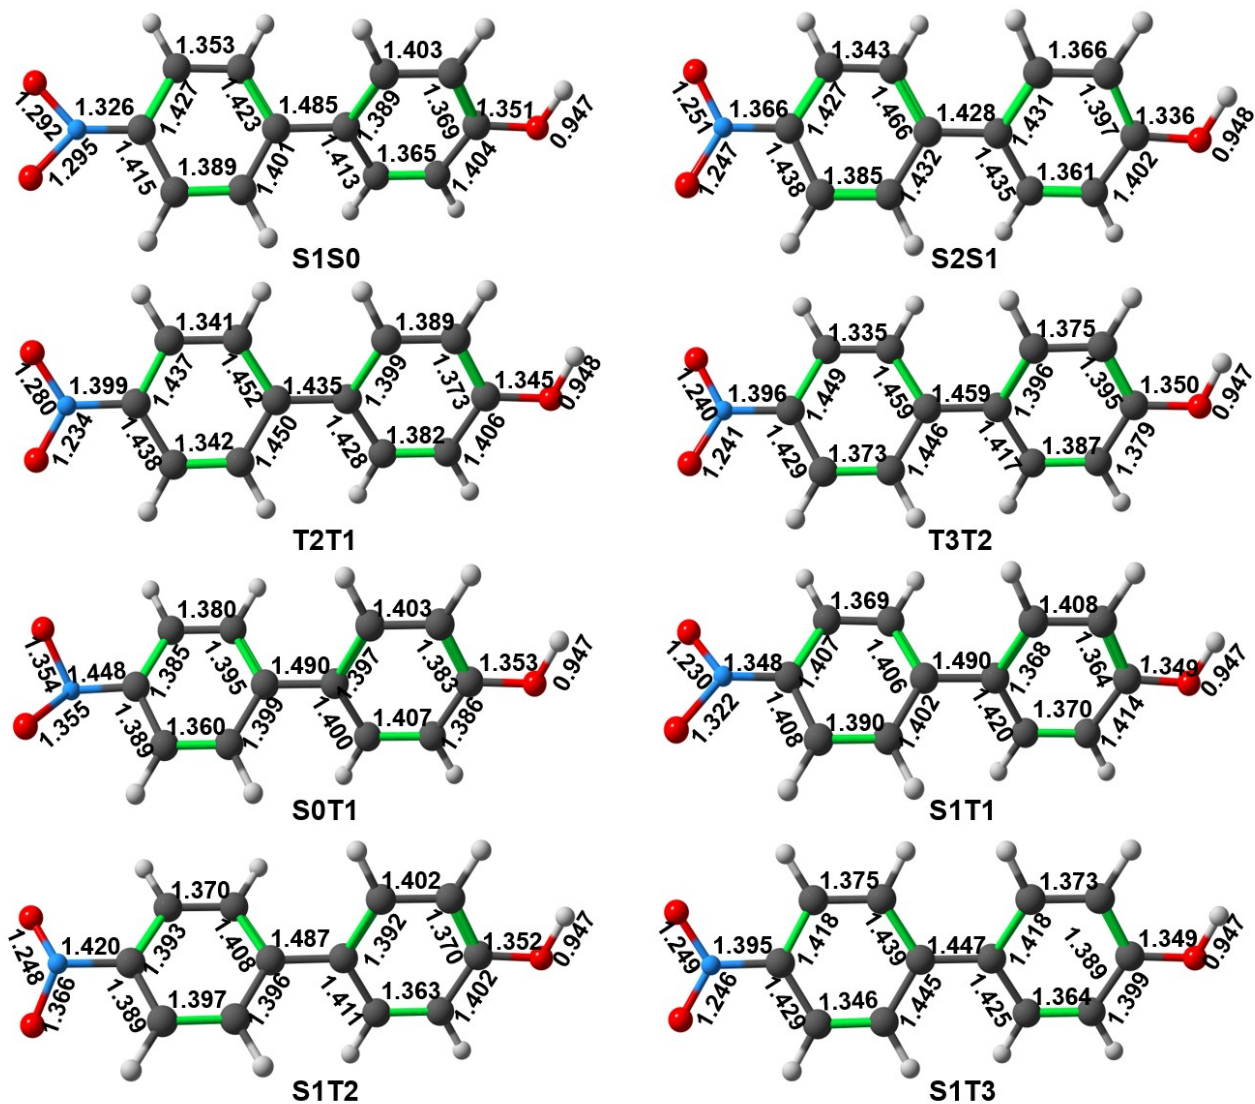

**Figure S7.** CASSCF optimized intersection structures in the gas phase in the lowest six electronically singlet and triplet states. Also shown are the selected bond lengths.

## 5. Excited-State Decay Paths of NO<sub>2</sub>-Bp-OH in the Gas Phase

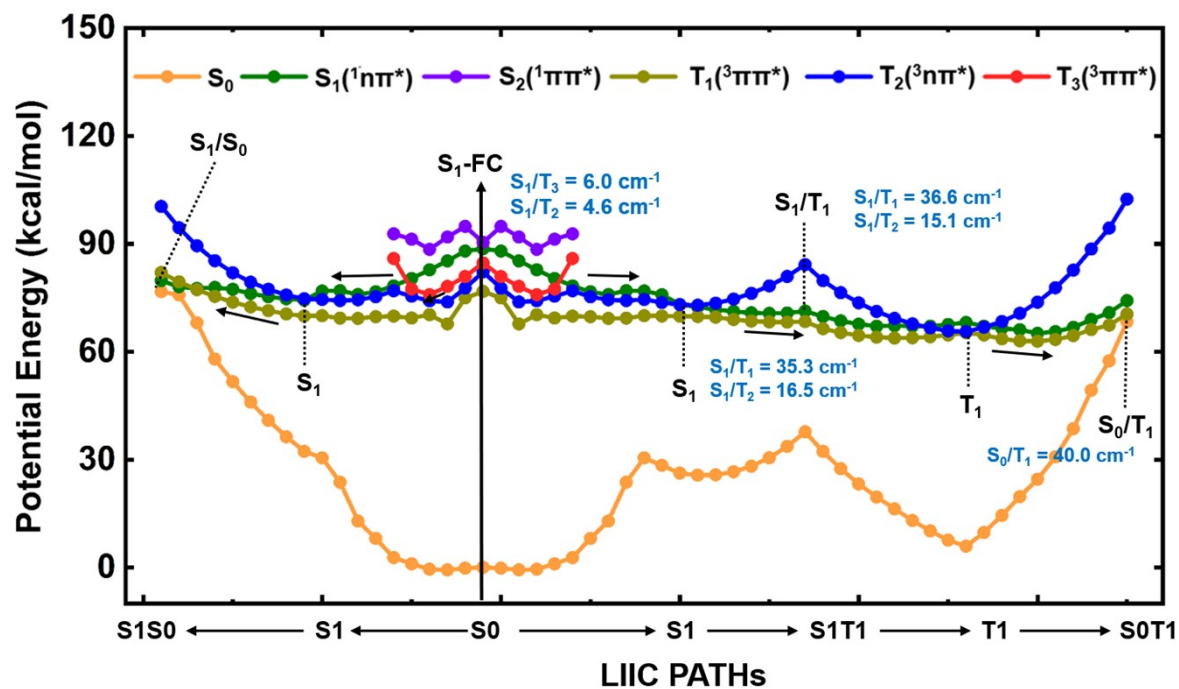

**Figure S8.** MS-CASPT2 computed LIIC paths of NO<sub>2</sub>-Bp-OH connecting the minima and surface-crossing intersections in the gas phase.

## 6. Cartesian Coordinates for Critical Structures (Unit: Angstrom)

GAS

S0

|   |              |              |              |
|---|--------------|--------------|--------------|
| C | 2.148340651  | 1.145221679  | 0.403836225  |
| C | 0.755559318  | 1.139238166  | 0.401752870  |
| C | 0.759713048  | -1.122839900 | -0.403130081 |
| C | 2.134501803  | -1.137366948 | -0.403031580 |
| C | 2.822986789  | 0.000626123  | 0.001403711  |
| H | 2.694136521  | 2.010815316  | 0.719827874  |
| H | 0.229335101  | 2.014053087  | 0.735885895  |
| H | 0.229524403  | -1.995806928 | -0.736632230 |
| H | 2.674919841  | -2.007193997 | -0.717408428 |
| C | -1.451559409 | 0.006111172  | -0.004675620 |
| C | -2.170691505 | -1.076033379 | 0.513518212  |
| C | -2.170945351 | 1.073114447  | -0.520577013 |
| C | -3.561560237 | -1.077555335 | 0.511300779  |
| H | -1.648677887 | -1.914218919 | 0.938064238  |
| C | -3.556853655 | 1.080872895  | -0.530514125 |
| H | -1.647723347 | 1.912741472  | -0.942352416 |
| C | -4.254029800 | 0.002286956  | -0.011927962 |
| H | -4.098026522 | -1.916006560 | 0.922619698  |

|    |              |              |              |
|----|--------------|--------------|--------------|
| H  | -4.103975448 | 1.908599168  | -0.941161581 |
| C  | 0.037993323  | 0.009296390  | -0.002224201 |
| O  | -5.602788713 | 0.055386829  | -0.042118360 |
| H  | -5.979518638 | -0.729042114 | 0.331491515  |
| N  | 4.276199528  | -0.007936108 | 0.003153367  |
| O  | 4.836424950  | -1.018948266 | -0.343524619 |
| O  | 4.847689874  | 0.996638206  | 0.351519143  |
| S1 |              |              |              |
| C  | 2.146490679  | 1.141430082  | 0.369042202  |
| C  | 0.752974309  | 1.125279852  | 0.381156043  |
| C  | 0.759872182  | -1.115068837 | -0.460948077 |
| C  | 2.135767865  | -1.128288092 | -0.471500458 |
| C  | 2.832989085  | 0.003302913  | -0.046594210 |
| H  | 2.676057990  | 2.018851444  | 0.689132773  |
| H  | 0.227753856  | 1.995023042  | 0.731187468  |
| H  | 0.230821607  | -1.986080105 | -0.802567351 |
| H  | 2.676772612  | -1.992767165 | -0.802802866 |
| C  | -1.456242072 | -0.009174833 | -0.013059163 |
| C  | -2.160610800 | -1.051357965 | 0.529992166  |
| C  | -2.192429879 | 1.070317142  | -0.559617503 |
| C  | -3.565855754 | -1.061551739 | 0.548633424  |

|    |              |              |              |
|----|--------------|--------------|--------------|
| H  | -1.636593945 | -1.880706945 | 0.970905867  |
| C  | -3.566418878 | 1.075515753  | -0.546537808 |
| H  | -1.668265637 | 1.894114402  | -1.009729776 |
| C  | -4.262499552 | -0.011613895 | 0.018597172  |
| H  | -4.086447907 | -1.895425248 | 0.988569656  |
| H  | -4.129146319 | 1.887442926  | -0.967756527 |
| C  | 0.034718033  | 0.001256134  | -0.031245429 |
| O  | -5.610168365 | 0.058132931  | -0.002190265 |
| H  | -5.992054678 | -0.712916242 | 0.394135020  |
| N  | 4.238787294  | 0.002139564  | -0.114640001 |
| O  | 4.935959629  | -1.013768542 | -0.232306881 |
| O  | 4.878746731  | 0.937966965  | 0.675239743  |
| S2 |              |              |              |
| C  | 2.157437324  | 1.242071742  | 0.044984315  |
| C  | 0.769597354  | 1.228431436  | 0.036619103  |
| C  | 0.779693124  | -1.229988270 | -0.053416834 |
| C  | 2.124036863  | -1.229032481 | -0.055594806 |
| C  | 2.865107409  | -0.009846988 | 0.000338822  |
| H  | 2.707234007  | 2.156921588  | 0.089800326  |
| H  | 0.267476191  | 2.173072935  | 0.092742605  |
| H  | 0.277310511  | -2.173527546 | -0.121632269 |

|    |              |              |              |
|----|--------------|--------------|--------------|
| H  | 2.664179802  | -2.153513803 | -0.106467319 |
| C  | -1.425719351 | 0.010335049  | 0.003465259  |
| C  | -2.186253068 | -1.188451883 | 0.160061909  |
| C  | -2.194054501 | 1.210299760  | -0.141968572 |
| C  | -3.553634437 | -1.186172426 | 0.169152370  |
| H  | -1.687367343 | -2.125703951 | 0.297518822  |
| C  | -3.556562396 | 1.207006065  | -0.135184409 |
| H  | -1.697081783 | 2.147989203  | -0.283133011 |
| C  | -4.260847429 | 0.007758590  | 0.021151051  |
| H  | -4.088506665 | -2.111681495 | 0.298190210  |
| H  | -4.113156334 | 2.117530263  | -0.254810969 |
| C  | 0.002652829  | 0.011562750  | -0.006171741 |
| O  | -5.597472461 | 0.069151184  | 0.020810922  |
| H  | -5.986145382 | -0.788768525 | 0.128216398  |
| N  | 4.229481485  | -0.009327098 | 0.007839332  |
| O  | 4.846439577  | -1.093561078 | -0.027533039 |
| O  | 4.857131799  | 1.069505935  | 0.050122542  |
| T1 |              |              |              |
| C  | 2.142370378  | 1.143126995  | 0.401264847  |
| C  | 0.748689026  | 1.130235782  | 0.396154127  |
| C  | 0.762812195  | -1.127423162 | -0.400292727 |

|   |              |              |              |
|---|--------------|--------------|--------------|
| C | 2.137522723  | -1.135499995 | -0.399050918 |
| C | 2.832790596  | 0.001787788  | 0.002356791  |
| H | 2.676629522  | 2.017210047  | 0.717105040  |
| H | 0.223158856  | 2.008051354  | 0.725723861  |
| H | 0.240110240  | -2.005710348 | -0.732780852 |
| H | 2.674115602  | -2.008963285 | -0.714010332 |
| C | -1.457998126 | -0.008400250 | -0.001956188 |
| C | -2.178768570 | -1.079068797 | 0.508902198  |
| C | -2.190980187 | 1.080472440  | -0.523356119 |
| C | -3.581826487 | -1.078920400 | 0.508154159  |
| H | -1.661329478 | -1.920558728 | 0.932907110  |
| C | -3.555934818 | 1.086169647  | -0.525846819 |
| H | -1.663488230 | 1.917581079  | -0.944458250 |
| C | -4.263662049 | -0.006948632 | -0.002631000 |
| H | -4.116070926 | -1.920199030 | 0.916847337  |
| H | -4.110363739 | 1.912381129  | -0.930728598 |
| C | 0.030764100  | 0.000596859  | -0.002477269 |
| O | -5.613021779 | 0.069516486  | -0.038267474 |
| H | -6.001908207 | -0.711289900 | 0.330678455  |
| N | 4.243741806  | -0.002850641 | 0.003258700  |
| O | 4.939405997  | -1.037801434 | -0.348527424 |



|    |              |              |              |
|----|--------------|--------------|--------------|
| O  | 4.944216160  | 1.028558432  | 0.356126647  |
| T2 |              |              |              |
| C  | 2.145582224  | 1.158700914  | 0.361001396  |
| C  | 0.750408873  | 1.143780153  | 0.364179936  |
| C  | 0.762348287  | -1.111896361 | -0.448115931 |
| C  | 2.134571062  | -1.114068522 | -0.468536494 |
| C  | 2.828982123  | 0.021996903  | -0.052181952 |
| H  | 2.688154442  | 2.026172785  | 0.681056819  |
| H  | 0.224005836  | 2.015291933  | 0.707695951  |
| H  | 0.235522225  | -1.985924045 | -0.784634047 |
| H  | 2.668717550  | -1.979970262 | -0.813008161 |
| C  | -1.454104937 | -0.000905459 | -0.014173732 |
| C  | -2.156568113 | -1.072870576 | 0.483623777  |
| C  | -2.192623626 | 1.094859828  | -0.508982755 |
| C  | -3.557102236 | -1.087567130 | 0.503820726  |
| H  | -1.629177589 | -1.918489348 | 0.887555296  |
| C  | -3.570918155 | 1.094374847  | -0.495195428 |
| H  | -1.673952922 | 1.940026021  | -0.923947499 |
| C  | -4.260072846 | -0.014406343 | 0.019693252  |
| H  | -4.075533361 | -1.940679089 | 0.907979654  |
| H  | -4.135351378 | 1.922697196  | -0.880565971 |

|    |              |              |              |
|----|--------------|--------------|--------------|
| C  | 0.034148924  | 0.012737931  | -0.032039703 |
| O  | -5.607896486 | 0.045374504  | 0.005716591  |
| H  | -5.983155451 | -0.745103596 | 0.368602884  |
| N  | 4.242385017  | 0.035202061  | -0.114932097 |
| O  | 4.849833238  | -1.162753523 | 0.164037623  |
| O  | 4.932775374  | 0.975472731  | 0.316445053  |
| T3 |              |              |              |
| C  | 2.146917545  | 1.137133554  | 0.422178429  |
| C  | 0.753649465  | 1.123480411  | 0.416880810  |
| C  | 0.766969888  | -1.119692401 | -0.417848199 |
| C  | 2.142524114  | -1.128254241 | -0.418180628 |
| C  | 2.840436197  | 0.000319131  | 0.001995030  |
| H  | 2.677116233  | 2.007705494  | 0.753274696  |
| H  | 0.228366966  | 1.996311165  | 0.759607763  |
| H  | 0.245983530  | -1.993728923 | -0.764320165 |
| H  | 2.673129523  | -1.999151117 | -0.749760642 |
| C  | -1.455769787 | -0.011081929 | 0.001283181  |
| C  | -2.173631725 | -1.067966860 | 0.527518739  |
| C  | -2.188532880 | 1.072374896  | -0.542561322 |
| C  | -3.579919507 | -1.071190560 | 0.525011587  |
| H  | -1.656085739 | -1.902384156 | 0.965822739  |

|      |              |              |              |
|------|--------------|--------------|--------------|
| C    | -3.551259717 | 1.077243311  | -0.546216301 |
| H    | -1.658654482 | 1.901503198  | -0.976211573 |
| C    | -4.260319437 | -0.009954253 | -0.003941481 |
| H    | -4.112685769 | -1.906686827 | 0.947009757  |
| H    | -4.106932167 | 1.895690265  | -0.964935769 |
| C    | 0.034331792  | -0.001269422 | -0.001084750 |
| O    | -5.609382638 | 0.068205714  | -0.044223803 |
| H    | -6.000044815 | -0.705292121 | 0.338069675  |
| N    | 4.251723847  | -0.002934870 | 0.001943059  |
| O    | 4.894451193  | -1.082610030 | -0.369018304 |
| O    | 4.898592984  | 1.074283998  | 0.372802768  |
| S1S0 |              |              |              |
| C    | 2.132844356  | 1.175346957  | 0.373277149  |
| C    | 0.743668155  | 1.153014724  | 0.370725716  |
| C    | 0.763249195  | -1.142872815 | -0.378312149 |
| C    | 2.116038481  | -1.166315965 | -0.378327707 |
| C    | 2.835921865  | 0.004892482  | 0.002410842  |
| H    | 2.671492603  | 2.058038247  | 0.660739968  |
| H    | 0.216448047  | 2.037084965  | 0.679258309  |
| H    | 0.230845457  | -2.023213938 | -0.689048210 |
| H    | 2.656221823  | -2.047709897 | -0.668883678 |

|      |              |              |              |
|------|--------------|--------------|--------------|
| C    | -1.463057256 | -0.002493272 | -0.001044241 |
| C    | -2.182065487 | -1.089104199 | 0.480258183  |
| C    | -2.200943351 | 1.098419428  | -0.491539845 |
| C    | -3.584712731 | -1.093525010 | 0.479813563  |
| H    | -1.664373253 | -1.941037601 | 0.882563075  |
| C    | -3.565550726 | 1.099935209  | -0.492420026 |
| H    | -1.678190383 | 1.948047819  | -0.892681114 |
| C    | -4.270409551 | -0.009615992 | 0.000197309  |
| H    | -4.115602737 | -1.947815251 | 0.864966985  |
| H    | -4.122546066 | 1.935242380  | -0.874389282 |
| C    | 0.021521342  | 0.011050613  | -0.001302078 |
| O    | -5.619110286 | 0.064567356  | -0.033292144 |
| H    | -6.007376725 | -0.726520791 | 0.313751234  |
| N    | 4.162010883  | -0.010490812 | 0.006611853  |
| O    | 5.055044778  | -0.903552706 | -0.264244247 |
| O    | 5.069606175  | 0.870681522  | 0.286005872  |
| S2S1 |              |              |              |
| C    | 2.155482284  | 1.231799549  | 0.052982184  |
| C    | 0.770279924  | 1.220337866  | 0.045677845  |
| C    | 0.777072448  | -1.234302319 | -0.054153814 |
| C    | 2.119964643  | -1.237509149 | -0.059473723 |

|   |              |              |              |
|---|--------------|--------------|--------------|
| C | 2.861310594  | -0.019638710 | -0.000202331 |
| H | 2.712587264  | 2.141331275  | 0.103179356  |
| H | 0.270051141  | 2.166093267  | 0.107558096  |
| H | 0.271910617  | -2.176216745 | -0.124374630 |
| H | 2.655472471  | -2.164833455 | -0.114720659 |
| C | -1.422795615 | 0.010466422  | 0.003432969  |
| C | -2.185479876 | -1.189344574 | 0.164086800  |
| C | -2.191800369 | 1.211886429  | -0.149465103 |
| C | -3.551750064 | -1.186037337 | 0.173093952  |
| H | -1.686515029 | -2.125570053 | 0.305837234  |
| C | -3.552527134 | 1.209221185  | -0.142405540 |
| H | -1.692713393 | 2.147333293  | -0.296584173 |
| C | -4.258372949 | 0.009043211  | 0.019794933  |
| H | -4.087911494 | -2.110222722 | 0.305480400  |
| H | -4.109637205 | 2.118667074  | -0.267324217 |
| C | 0.005089643  | 0.011373379  | -0.003161210 |
| O | -5.592668812 | 0.072342726  | 0.018925500  |
| H | -5.984757673 | -0.783441117 | 0.131957189  |
| N | 4.227185845  | 0.011755080  | 0.004109231  |
| O | 4.844595166  | -1.075648767 | -0.039467494 |
| O | 4.846905718  | 1.093175171  | 0.050316226  |

## T2T1

|   |              |              |              |
|---|--------------|--------------|--------------|
| C | 2.090966200  | 1.257816352  | 0.590041904  |
| C | 0.750424283  | 1.213659289  | 0.551529130  |
| C | 0.827220078  | -1.026896075 | -0.450873711 |
| C | 2.168401517  | -1.004824340 | -0.437345983 |
| C | 2.850461544  | 0.143327102  | 0.092269716  |
| H | 2.607748345  | 2.104453161  | 0.993596903  |
| H | 0.209674944  | 2.048287679  | 0.952215719  |
| H | 0.343819307  | -1.884580834 | -0.875709336 |
| H | 2.742442318  | -1.822119990 | -0.822667662 |
| C | -1.418077132 | 0.030811123  | 0.017965689  |
| C | -2.128605583 | -1.160769235 | -0.162172353 |
| C | -2.204530951 | 1.211547438  | 0.181777465  |
| C | -3.516931063 | -1.201717267 | -0.180218001 |
| H | -1.604684176 | -2.090343258 | -0.264690697 |
| C | -3.585392539 | 1.173794176  | 0.160125352  |
| H | -1.728751284 | 2.164851965  | 0.294221979  |
| C | -4.250234626 | -0.052047085 | -0.021680064 |
| H | -4.015509680 | -2.147172243 | -0.312668764 |
| H | -4.167547998 | 2.068722489  | 0.271602488  |
| C | 0.016526840  | 0.073787327  | 0.037158281  |

|   |              |              |              |
|---|--------------|--------------|--------------|
| O | -5.594658545 | -0.019053350 | -0.029706524 |
| H | -5.954996639 | -0.885656661 | -0.160149652 |
| N | 4.248486346  | 0.182703525  | 0.125544551  |
| O | 4.906672944  | -0.822564467 | -0.315678841 |
| O | 4.834546699  | 1.171502262  | 0.573278421  |

T3T2

|   |              |              |              |
|---|--------------|--------------|--------------|
| C | 2.148217765  | 1.227079330  | 0.213191676  |
| C | 0.775568796  | 1.222898279  | 0.199625883  |
| C | 0.783922806  | -1.210153426 | -0.214787627 |
| C | 2.119064375  | -1.229008488 | -0.216561228 |
| C | 2.852218355  | 0.001303702  | 0.006054920  |
| H | 2.696704904  | 2.130515723  | 0.387633146  |
| H | 0.259194689  | 2.143585755  | 0.389189208  |
| H | 0.258960248  | -2.125537424 | -0.411122922 |
| H | 2.663485871  | -2.134828702 | -0.392967618 |
| C | -1.445306736 | 0.009158561  | -0.009078919 |
| C | -2.178449349 | -1.136878253 | 0.303099382  |
| C | -2.192843849 | 1.172635352  | -0.318985352 |
| C | -3.553615567 | -1.146333973 | 0.317185705  |
| H | -1.667856879 | -2.043451386 | 0.569827254  |
| C | -3.579575600 | 1.165947065  | -0.308853344 |

|      |              |              |              |
|------|--------------|--------------|--------------|
| H    | -1.689514162 | 2.078622982  | -0.596605115 |
| C    | -4.265803820 | 0.012347012  | 0.008999781  |
| H    | -4.079966464 | -2.049344896 | 0.576715919  |
| H    | -4.135717240 | 2.052044859  | -0.553024410 |
| C    | 0.013806711  | 0.010855172  | -0.004842311 |
| O    | -5.614931606 | 0.054037586  | 0.007648262  |
| H    | -5.980032729 | -0.789510675 | 0.235235088  |
| N    | 4.248364106  | -0.016521559 | 0.013310009  |
| O    | 4.870861043  | -1.072019940 | -0.175241221 |
| O    | 4.894222425  | 1.024610923  | 0.209449075  |
| S0T1 |              |              |              |
| C    | 2.129815394  | 1.158077845  | 0.406295090  |
| C    | 0.740762591  | 1.137711913  | 0.398158831  |
| C    | 0.757931186  | -1.131448841 | -0.399689158 |
| C    | 2.122424396  | -1.148851883 | -0.402646799 |
| C    | 2.829196207  | 0.002617999  | 0.003381231  |
| H    | 2.668440462  | 2.031172680  | 0.722180511  |
| H    | 0.211587364  | 2.014027236  | 0.725378705  |
| H    | 0.229523498  | -2.007209756 | -0.729743353 |
| H    | 2.661593395  | -2.022132507 | -0.719021254 |
| C    | -1.465680965 | -0.007585079 | 0.001455380  |



|   |              |              |              |
|---|--------------|--------------|--------------|
| C | -2.182899381 | -1.075510509 | 0.508030395  |
| C | -2.201006471 | 1.084552079  | -0.522193019 |
| C | -3.588513531 | -1.080871429 | 0.505877966  |
| H | -1.665548910 | -1.917566939 | 0.931776470  |
| C | -3.563507170 | 1.087351109  | -0.524665039 |
| H | -1.673799450 | 1.921884248  | -0.942985370 |
| C | -4.271041881 | -0.010668981 | -0.002538648 |
| H | -4.119454470 | -1.925131052 | 0.912253454  |
| H | -4.120417667 | 1.912338668  | -0.928614397 |
| C | 0.022180343  | 0.004831118  | 0.000222810  |
| O | -5.619536909 | 0.066552543  | -0.041096863 |
| H | -6.010262355 | -0.713921314 | 0.326652046  |
| N | 4.168910582  | -0.005176438 | 0.002812228  |
| O | 5.064745348  | -0.887688945 | -0.299666514 |
| O | 5.075533039  | 0.864699734  | 0.303480612  |

S1T1

|   |             |              |              |
|---|-------------|--------------|--------------|
| C | 2.139304267 | 1.129067761  | 0.438998381  |
| C | 0.749865382 | 1.112547212  | 0.431486901  |
| C | 0.759454423 | -1.127044859 | -0.440660400 |
| C | 2.128300333 | -1.147395735 | -0.442531084 |
| C | 2.834467712 | -0.013331012 | -0.000799269 |

|   |              |              |              |
|---|--------------|--------------|--------------|
| H | 2.672491361  | 1.995459322  | 0.783653254  |
| H | 0.220962098  | 1.978334580  | 0.785809487  |
| H | 0.228631359  | -1.990101006 | -0.799037458 |
| H | 2.670282285  | -2.008249944 | -0.784218807 |
| C | -1.461208374 | -0.014837093 | -0.000441630 |
| C | -2.174106529 | -1.051779005 | 0.536553557  |
| C | -2.190032626 | 1.067897469  | -0.559149028 |
| C | -3.582542570 | -1.058484639 | 0.538978749  |
| H | -1.658370647 | -1.882058267 | 0.985695472  |
| C | -3.559557248 | 1.077304849  | -0.561581640 |
| H | -1.657582247 | 1.888447707  | -1.005896914 |
| C | -4.268071365 | -0.009615579 | -0.000462220 |
| H | -4.109742824 | -1.890413526 | 0.974553809  |
| H | -4.116051336 | 1.888871917  | -0.991880882 |
| C | 0.028990970  | -0.007837422 | -0.003655842 |
| O | -5.614648142 | 0.068620896  | -0.040096215 |
| H | -6.007155550 | -0.699214758 | 0.352071165  |
| N | 4.182844131  | -0.029942071 | -0.005147122 |
| O | 5.008152080  | -0.882313351 | -0.328939541 |
| O | 4.976301176  | 0.958120077  | 0.371792484  |

S1T2

|   |              |              |              |
|---|--------------|--------------|--------------|
| C | 2.146783547  | 1.126356473  | 0.458607732  |
| C | 0.750492076  | 1.125995543  | 0.431829390  |
| C | 0.768318396  | -1.145284842 | -0.345951505 |
| C | 2.138543326  | -1.159148323 | -0.334639632 |
| C | 2.829509015  | -0.018574502 | 0.066774273  |
| H | 2.682266964  | 1.995699272  | 0.790850049  |
| H | 0.225542419  | 2.007254635  | 0.751662193  |
| H | 0.242786977  | -2.020897465 | -0.680414038 |
| H | 2.681893682  | -2.031541977 | -0.640917068 |
| C | -1.451225816 | -0.009421620 | 0.012796379  |
| C | -2.183724119 | -1.097489622 | 0.479806684  |
| C | -2.174660736 | 1.096651759  | -0.482430906 |
| C | -3.585737160 | -1.091392330 | 0.458829643  |
| H | -1.675614739 | -1.953834652 | 0.884419662  |
| C | -3.537475364 | 1.105728477  | -0.503937569 |
| H | -1.640915778 | 1.945498391  | -0.870698752 |
| C | -4.256096444 | 0.000101613  | -0.027142602 |
| H | -4.129098757 | -1.943221918 | 0.831861920  |
| H | -4.083602764 | 1.946293141  | -0.890146984 |
| C | 0.035367831  | -0.005021860 | 0.033453363  |
| O | -5.604069084 | 0.082902374  | -0.080093326 |

|      |              |              |              |
|------|--------------|--------------|--------------|
| H    | -6.002147554 | -0.707667402 | 0.256744498  |
| N    | 4.247927566  | -0.035187223 | 0.126817619  |
| O    | 4.920962444  | -1.002607114 | -0.282499512 |
| O    | 4.854952171  | 1.140862682  | -0.210486305 |
| S1T3 |              |              |              |
| C    | 2.127462153  | 1.220224087  | 0.137674008  |
| C    | 0.781386058  | 1.208334089  | 0.132882011  |
| C    | 0.770613056  | -1.222562088 | -0.136653008 |
| C    | 2.145952156  | -1.229210089 | -0.144533013 |
| C    | 2.848128206  | -0.005622000 | -0.005705002 |
| H    | 2.668709194  | 2.137533153  | 0.258005019  |
| H    | 0.269781018  | 2.141018155  | 0.268721017  |
| H    | 0.261287019  | -2.155533154 | -0.275198020 |
| H    | 2.688863195  | -2.145106155 | -0.265367018 |
| C    | -1.435153105 | -0.000084002 | 0.005882001  |
| C    | -2.193985157 | -1.173011084 | 0.249963017  |
| C    | -2.189914160 | 1.184586085  | -0.234526017 |
| C    | -3.567159255 | -1.165073086 | 0.256967017  |
| H    | -1.696248122 | -2.097795153 | 0.468149036  |
| C    | -3.553543255 | 1.190213086  | -0.231716017 |
| H    | -1.684193121 | 2.104282152  | -0.456639034 |

|   |              |              |              |
|---|--------------|--------------|--------------|
| C | -4.265437306 | 0.011481003  | 0.016301004  |
| H | -4.103971294 | -2.076894150 | 0.459403033  |
| H | -4.103041296 | 2.092097153  | -0.428487032 |
| C | 0.011903001  | -0.007389002 | -0.001710999 |
| O | -5.612163406 | 0.081747005  | 0.008104000  |
| H | -5.996353434 | -0.766495057 | 0.181203011  |
| N | 4.242994306  | 0.006818999  | -0.008027000 |
| O | 4.899258351  | -1.048940075 | -0.130780008 |
| O | 4.885800352  | 1.067437079  | 0.111183008  |

Methanol

S0

|   |              |              |              |
|---|--------------|--------------|--------------|
| C | 4.570292096  | 1.385757933  | 0.506084446  |
| C | 3.209220621  | 1.295604434  | 0.334197674  |
| C | 3.422333544  | -0.952758919 | -0.476270166 |
| C | 4.804046452  | -0.883145662 | -0.305134175 |
| C | 5.363098434  | 0.289181534  | 0.184713764  |
| C | 1.123758361  | 0.077593001  | -0.360801462 |
| C | 0.376558244  | -1.046042179 | 0.022892636  |
| C | 0.442396287  | 1.143732061  | -0.920821617 |
| C | -1.000839794 | -1.086064060 | -0.158284837 |
| C | -0.935265743 | 1.117797164  | -1.103276910 |

|   |              |              |              |
|---|--------------|--------------|--------------|
| C | -1.656766372 | 0.003033927  | -0.723034852 |
| C | 2.601593390  | 0.136158682  | -0.166453683 |
| H | 5.015242446  | 2.282197930  | 0.889488963  |
| H | 2.595761952  | 2.132487262  | 0.610908511  |
| H | 2.988834436  | -1.856023498 | -0.864490868 |
| H | 5.429223740  | -1.719686542 | -0.540275911 |
| H | 0.864595798  | -1.888768621 | 0.477311629  |
| H | 0.984480364  | 2.017199813  | -1.236966928 |
| H | -1.561291853 | -1.949517000 | 0.155759862  |
| H | -1.450026674 | 1.962781817  | -1.523238002 |
| O | -2.987524908 | -0.002315029 | -0.953850289 |
| H | -3.470252820 | -0.610339413 | -0.385727706 |
| N | 6.799740967  | 0.365131550  | 0.390148966  |
| O | 7.474651275  | -0.567400992 | 0.030439074  |
| O | 7.239270991  | 1.345898509  | 0.937242188  |
| C | -4.666423705 | 0.881430726  | -4.029079013 |
| O | -4.875040183 | 1.309481181  | -2.711666401 |
| H | -4.134398911 | 1.056319314  | -2.166780060 |
| H | -5.553716424 | 1.123843802  | -4.597546926 |
| H | -3.817875752 | 1.387793816  | -4.480216672 |
| H | -4.502571326 | -0.190830444 | -4.086881583 |

|    |              |              |              |
|----|--------------|--------------|--------------|
| C  | -7.615211198 | 1.179482784  | -0.342464703 |
| O  | -6.721321571 | 0.217994049  | -0.841853411 |
| H  | -6.236101737 | 0.587247059  | -1.576761037 |
| H  | -8.351239849 | 1.454547747  | -1.089457161 |
| H  | -8.132493765 | 0.745779520  | 0.501397602  |
| H  | -7.097759787 | 2.074470423  | -0.011812623 |
| C  | -5.318102286 | -2.678034218 | 0.711466180  |
| O  | -4.863851884 | -1.357659425 | 0.542205000  |
| H  | -5.571057076 | -0.827404750 | 0.172103549  |
| H  | -5.575572984 | -3.134921087 | -0.239507888 |
| H  | -4.518337522 | -3.245562604 | 1.165623769  |
| H  | -6.182806873 | -2.711599857 | 1.364989144  |
| S1 |              |              |              |
| C  | 4.493108324  | 1.408648104  | 0.500414037  |
| C  | 3.127846225  | 1.305351096  | 0.359082028  |
| C  | 3.346697240  | -0.916008067 | -0.506181037 |
| C  | 4.729136343  | -0.844363061 | -0.356680023 |
| C  | 5.298314380  | 0.324953022  | 0.148475013  |
| C  | 1.041879072  | 0.100940010  | -0.360795027 |
| C  | 0.288044020  | -1.025648074 | 0.038220001  |
| C  | 0.366306028  | 1.146203081  | -0.944584067 |

|   |              |              |              |
|---|--------------|--------------|--------------|
| C | -1.074725078 | -1.079461077 | -0.163088010 |
| C | -1.019441073 | 1.110776082  | -1.146215083 |
| C | -1.735562124 | 0.007927001  | -0.767232053 |
| C | 2.519847184  | 0.158142012  | -0.162346013 |
| H | 4.923882354  | 2.313413165  | 0.887339064  |
| H | 2.514271179  | 2.131472152  | 0.667252050  |
| H | 2.914631208  | -1.815286132 | -0.906639063 |
| H | 5.356282388  | -1.673930120 | -0.614939042 |
| H | 0.778986053  | -1.854872136 | 0.514462036  |
| H | 0.907320067  | 2.016287146  | -1.272266093 |
| H | -1.639016116 | -1.939793140 | 0.152922012  |
| H | -1.527025112 | 1.947273140  | -1.591266114 |
| O | -3.061424220 | -0.031661003 | -1.027480075 |
| H | -3.547420256 | -0.610417043 | -0.432396033 |
| N | 6.691368482  | 0.420686028  | 0.243412020  |
| O | 7.491914540  | -0.516452039 | 0.162501009  |
| O | 7.193161518  | 1.413050102  | 1.054663074  |
| C | -4.897550352 | 0.801252059  | -4.047496291 |
| O | -4.964631358 | 1.314998092  | -2.745619196 |
| H | -4.204895301 | 1.032260075  | -2.243032162 |
| H | -5.814480420 | 1.070003076  | -4.553651329 |



|    |              |              |              |
|----|--------------|--------------|--------------|
| H  | -4.061392290 | 1.224124087  | -4.597628329 |
| H  | -4.806678346 | -0.281125022 | -4.052879294 |
| C  | -7.613064548 | 1.340500096  | -0.257683020 |
| O  | -6.748484488 | 0.350701024  | -0.751622055 |
| H  | -6.270240454 | 0.693335049  | -1.503969108 |
| H  | -8.322843600 | 1.654456122  | -1.014871072 |
| H  | -8.163316588 | 0.917577067  | 0.570581040  |
| H  | -7.067116508 | 2.210273159  | 0.094559005  |
| C  | -5.409913391 | -2.614249187 | 0.747654056  |
| O  | -4.913675356 | -1.311944094 | 0.558531039  |
| H  | -5.618779402 | -0.750553053 | 0.233654018  |
| H  | -5.842091423 | -3.012347216 | -0.165656011 |
| H  | -4.584099331 | -3.244187235 | 1.045590076  |
| H  | -6.160558441 | -2.636303189 | 1.530129113  |
| S2 |              |              |              |
| C  | 4.537192324  | 1.494473107  | 0.364684025  |
| C  | 3.211738229  | 1.394994103  | 0.172227012  |
| C  | 3.423444245  | -1.022066073 | -0.238508018 |
| C  | 4.807957347  | -0.940481070 | -0.070476006 |
| C  | 5.391224390  | 0.341752023  | 0.240658017  |
| C  | 1.145584081  | 0.051873002  | -0.392432027 |

|   |              |              |              |
|---|--------------|--------------|--------------|
| C | 0.404420029  | -1.139528081 | -0.246384017 |
| C | 0.414998029  | 1.208385085  | -0.797255057 |
| C | -0.971882072 | -1.177267087 | -0.472365034 |
| C | -0.923285064 | 1.170466085  | -1.028097074 |
| C | -1.637353118 | -0.029166001 | -0.854745063 |
| C | 2.569333183  | 0.130632008  | -0.152289010 |
| H | 4.977254357  | 2.437345175  | 0.623526044  |
| H | 2.609408189  | 2.270100166  | 0.310330023  |
| H | 2.997594214  | -1.976557142 | -0.481690036 |
| H | 5.435118394  | -1.799745127 | -0.156553009 |
| H | 0.888406065  | -2.040218144 | 0.079069003  |
| H | 0.931673068  | 2.134021151  | -0.959185068 |
| H | -1.515480111 | -2.095510150 | -0.334758025 |
| H | -1.456422104 | 2.051842147  | -1.333113094 |
| O | -2.952074213 | 0.012855001  | -1.097442080 |
| H | -3.438848245 | -0.760148053 | -0.783437059 |
| N | 6.729985483  | 0.441715034  | 0.423099029  |
| O | 7.469152536  | -0.582461043 | 0.296166023  |
| O | 7.252302520  | 1.531268108  | 0.723226054  |
| C | -4.918957355 | 1.916324140  | -3.577378255 |
| O | -4.957976356 | 1.866732135  | -2.174998156 |

|    |              |              |              |
|----|--------------|--------------|--------------|
| H  | -4.187766299 | 1.412153104  | -1.846951135 |
| H  | -5.820713419 | 2.411129173  | -3.910904282 |
| H  | -4.062879294 | 2.484464181  | -3.929049283 |
| H  | -4.888459351 | 0.923394069  | -4.015810290 |
| C  | -7.400910531 | 0.667387049  | 0.206761013  |
| O  | -6.828591493 | 0.091540007  | -0.941005067 |
| H  | -6.319785457 | 0.751292054  | -1.406374102 |
| H  | -8.079953582 | 1.471121108  | -0.054320002 |
| H  | -7.963542572 | -0.102808006 | 0.715160054  |
| H  | -6.643587481 | 1.054209077  | 0.881998062  |
| C  | -5.160463373 | -2.571649186 | 0.821269057  |
| O  | -4.820237349 | -1.759696125 | -0.272106021 |
| H  | -5.579859400 | -1.239407091 | -0.536231039 |
| H  | -6.058239437 | -3.141568225 | 0.614661045  |
| H  | -4.348337314 | -3.263417235 | 0.986521073  |
| H  | -5.312312383 | -1.985305141 | 1.723254122  |
| T1 |              |              |              |
| C  | 4.469571319  | 1.455410105  | 0.480211033  |
| C  | 3.109807224  | 1.349906095  | 0.339143026  |
| C  | 3.330935240  | -0.886910065 | -0.488963038 |
| C  | 4.719131342  | -0.802438057 | -0.339961023 |

|   |              |              |              |
|---|--------------|--------------|--------------|
| C | 5.280173380  | 0.370999025  | 0.146340010  |
| C | 1.025114076  | 0.119309006  | -0.349594023 |
| C | 0.277310019  | -0.985950070 | 0.038546001  |
| C | 0.333431023  | 1.197162088  | -0.942492065 |
| C | -1.111301079 | -1.032654074 | -0.160173010 |
| C | -1.019293073 | 1.160967084  | -1.131368083 |
| C | -1.752854128 | 0.031208001  | -0.740184052 |
| C | 2.501684180  | 0.185125014  | -0.162304012 |
| H | 4.905038353  | 2.360743170  | 0.856854062  |
| H | 2.493494178  | 2.180223157  | 0.631452045  |
| H | 2.905315211  | -1.794123127 | -0.878094062 |
| H | 5.341439384  | -1.636713115 | -0.593362041 |
| H | 0.759809056  | -1.822095130 | 0.510697035  |
| H | 0.881493063  | 2.064966150  | -1.263745090 |
| H | -1.670096119 | -1.896357134 | 0.156823011  |
| H | -1.539108113 | 1.992099142  | -1.572717112 |
| O | -3.081478222 | 0.040599002  | -0.995375071 |
| H | -3.577332259 | -0.554284042 | -0.425118030 |
| N | 6.700806480  | 0.508047037  | 0.242363016  |
| O | 7.434970533  | -0.561568040 | 0.138659007  |
| O | 7.177396518  | 1.342957098  | 1.121850079  |

|    |              |              |              |
|----|--------------|--------------|--------------|
| C  | -4.812410347 | 0.803853056  | -4.052456291 |
| O  | -4.925898356 | 1.360392097  | -2.771998201 |
| H  | -4.189960300 | 1.083826080  | -2.231623159 |
| H  | -5.691637409 | 1.088985076  | -4.613705332 |
| H  | -3.934759285 | 1.179407085  | -4.571429330 |
| H  | -4.761389341 | -0.280883019 | -4.020794288 |
| C  | -7.647853550 | 1.359727096  | -0.344047023 |
| O  | -6.778202489 | 0.375371030  | -0.840521059 |
| H  | -6.279809449 | 0.732251050  | -1.572916115 |
| H  | -8.352413601 | 1.679242122  | -1.103739078 |
| H  | -8.203370591 | 0.928479066  | 0.476491034  |
| H  | -7.105025512 | 2.226784161  | 0.019036003  |
| C  | -5.432929389 | -2.590325184 | 0.709361049  |
| O  | -4.965090355 | -1.277067090 | 0.524816040  |
| H  | -5.672134407 | -0.733674050 | 0.175094015  |
| H  | -5.806829417 | -3.013587216 | -0.217901014 |
| H  | -4.604468332 | -3.190199228 | 1.057459077  |
| H  | -6.219468447 | -2.624386191 | 1.454770102  |
| T2 |              |              |              |
| C  | 4.484712324  | 1.441507106  | 0.453227031  |
| C  | 3.125297226  | 1.341439095  | 0.308573023  |

|   |              |              |              |
|---|--------------|--------------|--------------|
| C | 3.334623241  | -0.911517067 | -0.486917037 |
| C | 4.720588341  | -0.838681063 | -0.327641025 |
| C | 5.285980380  | 0.342384025  | 0.141737009  |
| C | 1.035119076  | 0.111631010  | -0.361738027 |
| C | 0.286565022  | -0.992474074 | 0.027680002  |
| C | 0.343001024  | 1.192056088  | -0.950125066 |
| C | -1.102403080 | -1.036261073 | -0.164929012 |
| C | -1.010546075 | 1.158346085  | -1.133682080 |
| C | -1.745046123 | 0.030473000  | -0.739595052 |
| C | 2.511787179  | 0.172766011  | -0.177622011 |
| H | 4.922854354  | 2.353728168  | 0.813855061  |
| H | 2.513669182  | 2.179764159  | 0.586367043  |
| H | 2.901950210  | -1.820836132 | -0.862630064 |
| H | 5.345748384  | -1.678599119 | -0.554920039 |
| H | 0.768413055  | -1.830008134 | 0.498064035  |
| H | 0.890609062  | 2.059227149  | -1.273791092 |
| H | -1.661163120 | -1.899380139 | 0.153403013  |
| H | -1.531479113 | 1.992196145  | -1.568622111 |
| O | -3.073710223 | 0.043131004  | -0.988779072 |
| H | -3.568428259 | -0.557557041 | -0.423221030 |
| N | 6.688081482  | 0.447790032  | 0.245797017  |

|   |              |              |              |
|---|--------------|--------------|--------------|
| O | 7.471071539  | -0.506818039 | 0.121525010  |
| O | 7.164683516  | 1.328547094  | 1.174933082  |
| C | -4.824881345 | 0.806760059  | -4.046267293 |
| O | -4.932804357 | 1.359515097  | -2.763602200 |
| H | -4.193404302 | 1.083944076  | -2.227702162 |
| H | -5.706298413 | 1.094149079  | -4.602732334 |
| H | -3.949265282 | 1.183278086  | -4.567843329 |
| H | -4.774325344 | -0.277965019 | -4.018051287 |
| C | -7.644828550 | 1.350440098  | -0.319277024 |
| O | -6.767856487 | 0.373136028  | -0.816403060 |
| H | -6.277888451 | 0.730491054  | -1.554044114 |
| H | -8.354182604 | 1.662749118  | -1.077472079 |
| H | -8.194354591 | 0.915621064  | 0.503425034  |
| H | -7.108898513 | 2.222884162  | 0.041388000  |
| C | -5.422647390 | -2.594878188 | 0.719336051  |
| O | -4.949420359 | -1.284860093 | 0.526692037  |
| H | -5.657570407 | -0.737519052 | 0.185204015  |
| H | -5.813929420 | -3.016378218 | -0.201724013 |
| H | -4.593104330 | -3.200440231 | 1.054924075  |
| H | -6.198288445 | -2.622965186 | 1.476297107  |

T3

|   |              |              |              |
|---|--------------|--------------|--------------|
| C | 4.514372323  | 1.454030106  | 0.540668037  |
| C | 3.177300231  | 1.366758099  | 0.371375027  |
| C | 3.384694246  | -0.910050066 | -0.496102036 |
| C | 4.759453341  | -0.843596061 | -0.330720022 |
| C | 5.332120382  | 0.348670026  | 0.184928012  |
| C | 1.076974076  | 0.159209013  | -0.389655026 |
| C | 0.321173024  | -0.986048073 | 0.051679006  |
| C | 0.437226029  | 1.181385086  | -0.995535073 |
| C | -1.099042079 | -1.034070072 | -0.136284012 |
| C | -0.998564073 | 1.152800085  | -1.180138085 |
| C | -1.735526124 | -0.006211001 | -0.723202051 |
| C | 2.550365185  | 0.197120012  | -0.161825012 |
| H | 4.964835355  | 2.342324171  | 0.935708066  |
| H | 2.557043185  | 2.196005159  | 0.655487048  |
| H | 2.942903211  | -1.806682128 | -0.889181067 |
| H | 5.389879385  | -1.673318121 | -0.573110042 |
| H | 0.815250057  | -1.793216128 | 0.555359040  |
| H | 0.979941071  | 2.037872148  | -1.351562097 |
| H | -1.647508120 | -1.889967134 | 0.216719018  |
| H | -1.529925109 | 1.996059144  | -1.575133113 |
| O | -3.060973218 | 0.040688005  | -0.960271072 |



|   |              |              |              |
|---|--------------|--------------|--------------|
| H | -3.562631255 | -0.575233043 | -0.416128028 |
| N | 6.749935486  | 0.424509032  | 0.392138027  |
| O | 7.428972536  | -0.515934038 | 0.050111006  |
| O | 7.194369518  | 1.416601103  | 0.923429069  |
| C | -4.805928344 | 0.789402056  | -4.040480290 |
| O | -4.915891355 | 1.347173096  | -2.759895197 |
| H | -4.178364301 | 1.073288076  | -2.221122160 |
| H | -5.686611411 | 1.074696079  | -4.599082329 |
| H | -3.929770281 | 1.164467083  | -4.562141327 |
| H | -4.755422344 | -0.295078024 | -4.007966290 |
| C | -7.655026553 | 1.334388094  | -0.336963022 |
| O | -6.769240486 | 0.362184028  | -0.828693059 |
| H | -6.274059452 | 0.723182053  | -1.560965112 |
| H | -8.361599600 | 1.642451117  | -1.099470078 |
| H | -8.207016591 | 0.896365066  | 0.482377035  |
| H | -7.126383513 | 2.209908159  | 0.026758001  |
| C | -5.421869388 | -2.613156188 | 0.702663052  |
| O | -4.953286358 | -1.300829091 | 0.513781038  |
| H | -5.662362408 | -0.754714053 | 0.172642014  |
| H | -5.814915420 | -3.031509216 | -0.219066014 |
| H | -4.588949330 | -3.217277233 | 1.032068073  |

|      |              |              |              |
|------|--------------|--------------|--------------|
| H    | -6.194463446 | -2.646988193 | 1.462679106  |
| S1S0 |              |              |              |
| C    | 4.465167427  | 1.704520692  | 0.544158728  |
| C    | 3.105904346  | 1.578039069  | 0.358086349  |
| C    | 3.365892954  | -0.725957487 | -0.248413973 |
| C    | 4.740858957  | -0.625111819 | -0.049898515 |
| C    | 5.278781236  | 0.599624272  | 0.343689294  |
| C    | 1.054359802  | 0.280695531  | -0.296484513 |
| C    | 0.305225516  | -0.819359611 | 0.087777456  |
| C    | 0.370043014  | 1.339241681  | -0.948301172 |
| C    | -1.078777739 | -0.890227747 | -0.167369731 |
| C    | -0.969523715 | 1.279558817  | -1.186411281 |
| C    | -1.707755563 | 0.148413020  | -0.794821503 |
| C    | 2.523103037  | 0.372059063  | -0.055180492 |
| H    | 4.883783324  | 2.642928647  | 0.860759427  |
| H    | 2.477830769  | 2.424869948  | 0.562542007  |
| H    | 2.955050941  | -1.667283754 | -0.564633178 |
| H    | 5.380325053  | -1.473629233 | -0.196311980 |
| H    | 0.773551752  | -1.638738626 | 0.601342801  |
| H    | 0.918004621  | 2.206725263  | -1.269341092 |
| H    | -1.636543249 | -1.756239084 | 0.144465929  |

|   |              |              |              |
|---|--------------|--------------|--------------|
| H | -1.483736514 | 2.095168825  | -1.662073882 |
| O | -3.025754265 | 0.140322201  | -1.101599868 |
| H | -3.539384546 | -0.441600748 | -0.533267620 |
| N | 6.675775565  | 0.735502977  | 0.437441473  |
| O | 7.459518446  | -0.230719312 | 0.767884719  |
| O | 7.234381986  | 1.547018006  | 1.334085696  |
| C | -4.895628602 | 0.839720684  | -4.124987182 |
| O | -4.885484036 | 1.465274038  | -2.870840107 |
| H | -4.142586686 | 1.155339136  | -2.359436134 |
| H | -5.782565343 | 1.167002281  | -4.649236960 |
| H | -4.024285990 | 1.115223161  | -4.712604745 |
| H | -4.929496872 | -0.242432227 | -4.039524442 |
| C | -7.399918885 | 1.748650423  | -0.226021409 |
| O | -6.713622391 | 0.677056138  | -0.818843795 |
| H | -6.224985131 | 0.989632281  | -1.577456503 |
| H | -8.066250299 | 2.229828899  | -0.932937982 |
| H | -7.991986913 | 1.352871245  | 0.586330990  |
| H | -6.716043631 | 2.491832593  | 0.173427837  |
| C | -5.446243838 | -2.402392769 | 0.660041010  |
| O | -4.933917545 | -1.111322966 | 0.434429761  |
| H | -5.631803968 | -0.534961040 | 0.121461419  |

|      |              |              |              |
|------|--------------|--------------|--------------|
| H    | -5.889277000 | -2.819654898 | -0.239580136 |
| H    | -4.624671425 | -3.033905902 | 0.967288798  |
| H    | -6.191123121 | -2.394763499 | 1.447472955  |
| S2S1 |              |              |              |
| C    | 4.531130329  | 1.503674108  | 0.363537028  |
| C    | 3.206669230  | 1.402945102  | 0.171324013  |
| C    | 3.425124245  | -1.013166074 | -0.237168019 |
| C    | 4.808564345  | -0.929070067 | -0.070157007 |
| C    | 5.388064387  | 0.355250028  | 0.240047019  |
| C    | 1.148167085  | 0.051513003  | -0.388927027 |
| C    | 0.407636030  | -1.141179083 | -0.241924016 |
| C    | 0.416538030  | 1.207756089  | -0.793890056 |
| C    | -0.967908068 | -1.179976083 | -0.468043031 |
| C    | -0.921216065 | 1.169246083  | -1.026954073 |
| C    | -1.633634119 | -0.030790004 | -0.853129062 |
| C    | 2.571348185  | 0.132374012  | -0.150291011 |
| H    | 4.968382356  | 2.448713177  | 0.620578045  |
| H    | 2.601409188  | 2.275865166  | 0.310208021  |
| H    | 3.001784219  | -1.968987140 | -0.481032036 |
| H    | 5.440002393  | -1.784970128 | -0.155432011 |
| H    | 0.892715066  | -2.041131145 | 0.083235004  |

|   |              |              |              |
|---|--------------|--------------|--------------|
| H | 0.932981067  | 2.133526154  | -0.954643070 |
| H | -1.511491109 | -2.097933152 | -0.329345023 |
| H | -1.455090107 | 2.050301146  | -1.331319093 |
| O | -2.946718214 | 0.010512000  | -1.093952077 |
| H | -3.434489248 | -0.762841057 | -0.780852054 |
| N | 6.730313483  | 0.436064030  | 0.415184029  |
| O | 7.464270537  | -0.599653043 | 0.287097020  |
| O | 7.251603520  | 1.519308110  | 0.715882053  |
| C | -4.916708351 | 1.916009137  | -3.576299258 |
| O | -4.954142355 | 1.864075136  | -2.173855154 |
| H | -4.183765301 | 1.409490104  | -1.847133135 |
| H | -5.818887419 | 2.410971171  | -3.908197281 |
| H | -4.061348294 | 2.484926179  | -3.928231281 |
| H | -4.886162351 | 0.923949065  | -4.016577290 |
| C | -7.399560531 | 0.665872046  | 0.207974014  |
| O | -6.825794490 | 0.090288005  | -0.939319066 |
| H | -6.318178457 | 0.750489054  | -1.405065103 |
| H | -8.078590580 | 1.469393106  | -0.053491004 |
| H | -7.962493574 | -0.104221009 | 0.716042050  |
| H | -6.643211479 | 1.053411078  | 0.883869064  |
| C | -5.157392373 | -2.572159186 | 0.822233059  |

|      |              |              |              |
|------|--------------|--------------|--------------|
| O    | -4.816308346 | -1.759745127 | -0.270795022 |
| H    | -5.576054403 | -1.239939089 | -0.535622041 |
| H    | -6.055221434 | -3.141649226 | 0.614939042  |
| H    | -4.345831311 | -3.264483236 | 0.987661069  |
| H    | -5.309419382 | -1.986166144 | 1.724381122  |
| T2T1 |              |              |              |
| C    | 4.143744298  | 1.196507088  | 0.666381046  |
| C    | 2.827243205  | 1.079016076  | 0.344469026  |
| C    | 3.184822232  | -1.127359079 | -0.549095041 |
| C    | 4.538854327  | -1.041437077 | -0.227199019 |
| C    | 5.018210363  | 0.123205010  | 0.385668030  |
| C    | 0.850630059  | -0.175094015 | -0.592412041 |
| C    | 0.113492010  | -1.318506093 | -0.312631024 |
| C    | 0.169307012  | 0.915289063  | -1.175493084 |
| C    | -1.256095092 | -1.389505101 | -0.601569046 |
| C    | -1.169131082 | 0.852715060  | -1.454011104 |
| C    | -1.893129137 | -0.311747022 | -1.162576084 |
| C    | 2.300267164  | -0.080937004 | -0.273978018 |
| H    | 4.518235327  | 2.084786151  | 1.140032080  |
| H    | 2.161499156  | 1.885749136  | 0.590424044  |
| H    | 2.821332205  | -2.020275147 | -1.024195075 |

|   |              |              |              |
|---|--------------|--------------|--------------|
| H | 5.205571374  | -1.855221133 | -0.436013033 |
| H | 0.584377040  | -2.165125158 | 0.153383010  |
| H | 0.708740049  | 1.815160129  | -1.411753104 |
| H | -1.808675131 | -2.280562164 | -0.360116024 |
| H | -1.685270123 | 1.695918122  | -1.875981138 |
| O | -3.209721233 | -0.330336024 | -1.484292107 |
| H | -3.721559270 | -0.860965060 | -0.865052060 |
| N | 6.327802455  | 0.223013015  | 0.726364054  |
| O | 7.273516522  | -0.606488045 | 0.562185040  |
| O | 6.949078501  | 1.159638082  | 1.304621096  |
| C | -5.542572401 | 0.469111033  | -4.124519299 |
| O | -5.159558369 | 1.195484088  | -2.986126213 |
| H | -4.384814317 | 0.799938059  | -2.594479189 |
| H | -6.448780465 | 0.915682067  | -4.508983324 |
| H | -4.779727344 | 0.511811038  | -4.897418354 |
| H | -5.743551412 | -0.572716043 | -3.891398279 |
| C | -7.759955559 | 1.369420099  | -0.349358025 |
| O | -6.745453487 | 0.477681032  | -0.729011052 |
| H | -6.296671455 | 0.808979058  | -1.504066107 |
| H | -8.491887611 | 1.492891105  | -1.140406082 |
| H | -8.260599597 | 0.957799068  | 0.515178040  |

|   |              |              |              |
|---|--------------|--------------|--------------|
| H | -7.359916530 | 2.343489171  | -0.086243006 |
| C | -5.537760397 | -2.671889195 | 0.469018035  |
| O | -4.967917358 | -1.392616102 | 0.353256024  |
| H | -5.650663405 | -0.759829054 | 0.130636008  |
| H | -5.971082431 | -3.003881216 | -0.469851034 |
| H | -4.752369340 | -3.357937240 | 0.752906055  |
| H | -6.304871453 | -2.691651192 | 1.235047088  |

T3T2

|   |              |              |              |
|---|--------------|--------------|--------------|
| C | 4.549917328  | 1.582163112  | 0.407836027  |
| C | 3.222975234  | 1.461479107  | 0.240603015  |
| C | 3.445142248  | -0.949833066 | -0.154687014 |
| C | 4.808242346  | -0.841344062 | -0.015799000 |
| C | 5.384513385  | 0.424103031  | 0.274113021  |
| C | 1.145697082  | 0.106558010  | -0.234238018 |
| C | 0.430052031  | -1.114445080 | -0.076261003 |
| C | 0.361698026  | 1.244093088  | -0.583696042 |
| C | -0.927557064 | -1.186366084 | -0.248382016 |
| C | -0.988731071 | 1.168323087  | -0.764029054 |
| C | -1.656521119 | -0.048198004 | -0.599231046 |
| C | 2.574960184  | 0.197295016  | -0.053741003 |
| H | 4.990837358  | 2.529009184  | 0.650949046  |



|   |              |              |              |
|---|--------------|--------------|--------------|
| H | 2.615842191  | 2.333655168  | 0.380375025  |
| H | 3.030332220  | -1.912428136 | -0.382851029 |
| H | 5.440338394  | -1.699207123 | -0.118090010 |
| H | 0.949978066  | -2.005865143 | 0.219489017  |
| H | 0.839319060  | 2.191059156  | -0.744538054 |
| H | -1.439288101 | -2.120609154 | -0.092193006 |
| H | -1.557940113 | 2.040942149  | -1.028642074 |
| O | -2.985905213 | -0.079524006 | -0.840689063 |
| H | -3.464924248 | -0.709467049 | -0.292812023 |
| N | 6.766660488  | 0.534371039  | 0.479095036  |
| O | 7.502788540  | -0.456621031 | 0.389814028  |
| O | 7.275286525  | 1.626115119  | 0.779778057  |
| C | -4.597399333 | 0.939955068  | -3.922787285 |
| O | -4.844032349 | 1.288009095  | -2.588388184 |
| H | -4.117157295 | 1.005413071  | -2.039680146 |
| H | -5.469379393 | 1.213851089  | -4.500598326 |
| H | -3.738504271 | 1.473497108  | -4.319714313 |
| H | -4.428764319 | -0.126631010 | -4.040816291 |
| C | -7.640470548 | 1.094886080  | -0.281517021 |
| O | -6.725477486 | 0.152634012  | -0.779448057 |
| H | -6.233002446 | 0.538452038  | -1.500572108 |

|   |              |              |              |
|---|--------------|--------------|--------------|
| H | -8.365854603 | 1.373883100  | -1.037743076 |
| H | -8.168188586 | 0.640494044  | 0.545124037  |
| H | -7.140120516 | 1.991063145  | 0.072940003  |
| C | -5.356681387 | -2.714785197 | 0.861529063  |
| O | -4.874890352 | -1.415625104 | 0.624883045  |
| H | -5.578049402 | -0.884327061 | 0.249067020  |
| H | -5.734908413 | -3.172339226 | -0.047710002 |
| H | -4.535844324 | -3.310588238 | 1.234970088  |
| H | -6.145170443 | -2.709147194 | 1.606547118  |

S0T1

|   |              |              |              |
|---|--------------|--------------|--------------|
| C | 4.292767311  | 1.503586106  | 0.447250033  |
| C | 2.942155214  | 1.356113095  | 0.331670022  |
| C | 3.218494230  | -0.866579065 | -0.524935036 |
| C | 4.612975332  | -0.734473055 | -0.401769031 |
| C | 5.137943368  | 0.443779032  | 0.082432004  |
| C | 0.886071065  | 0.063286006  | -0.333483025 |
| C | 0.179776011  | -1.075328075 | 0.028662002  |
| C | 0.155601009  | 1.137882081  | -0.881884062 |
| C | -1.208362087 | -1.157448081 | -0.147120012 |
| C | -1.198766088 | 1.069325078  | -1.050716073 |
| C | -1.892320136 | -0.093182007 | -0.678533051 |

|   |              |              |              |
|---|--------------|--------------|--------------|
| C | 2.363074169  | 0.170837011  | -0.169429013 |
| H | 4.707318338  | 2.419730177  | 0.825772059  |
| H | 2.301486166  | 2.160722155  | 0.643038047  |
| H | 2.815908202  | -1.783264129 | -0.915820066 |
| H | 5.256631379  | -1.544052110 | -0.680858049 |
| H | 0.692491048  | -1.913554135 | 0.464320031  |
| H | 0.672537049  | 2.030813146  | -1.185117088 |
| H | -1.734622125 | -2.046274149 | 0.154939013  |
| H | -1.749821127 | 1.899414138  | -1.454136106 |
| O | -3.225654231 | -0.110216006 | -0.900269066 |
| H | -3.691771263 | -0.745256052 | -0.347784025 |
| N | 6.564727471  | 0.671036048  | 0.143345010  |
| O | 7.296181528  | -0.440009030 | 0.145870011  |
| O | 6.972307504  | 1.165999083  | 1.309871095  |
| C | -4.837975349 | 0.859284060  | -3.974577285 |
| O | -5.101098365 | 1.216735090  | -2.645461189 |
| H | -4.376773315 | 0.944207065  | -2.087967152 |
| H | -5.691268409 | 1.154440085  | -4.569507327 |
| H | -3.957586282 | 1.369578101  | -4.355492315 |
| H | -4.696574336 | -0.211905013 | -4.087193295 |
| C | -8.016523576 | 0.550327040  | -0.520886036 |

|      |              |              |              |
|------|--------------|--------------|--------------|
| O    | -6.948889500 | -0.227562018 | -0.999523074 |
| H    | -6.460113463 | 0.269090018  | -1.651676121 |
| H    | -8.701974625 | 0.805522059  | -1.321884096 |
| H    | -8.549494613 | -0.037288004 | 0.213520014  |
| H    | -7.665560551 | 1.464001107  | -0.051605005 |
| C    | -5.379591386 | -2.905347211 | 0.766855057  |
| O    | -5.053666366 | -1.552896112 | 0.567485041  |
| H    | -5.781948418 | -1.117258080 | 0.121841008  |
| H    | -5.527652397 | -3.423932247 | -0.175735012 |
| H    | -4.557239326 | -3.369142240 | 1.292973095  |
| H    | -6.276969450 | -3.007507218 | 1.367389101  |
| S1T1 |              |              |              |
| C    | 4.470358322  | 1.458136104  | 0.479807033  |
| C    | 3.098955222  | 1.357219097  | 0.326324025  |
| C    | 3.320065241  | -0.892387066 | -0.479393037 |
| C    | 4.704481339  | -0.818574057 | -0.318218024 |
| C    | 5.272727380  | 0.360564026  | 0.162778012  |
| C    | 1.015283074  | 0.129716007  | -0.374398026 |
| C    | 0.260556019  | -0.964243071 | 0.032315002  |
| C    | 0.340069023  | 1.188001088  | -0.996487073 |
| C    | -1.115299082 | -1.015919071 | -0.181385011 |

|   |              |              |              |
|---|--------------|--------------|--------------|
| C | -1.018183071 | 1.151647082  | -1.205481088 |
| C | -1.753498126 | 0.039801003  | -0.799785058 |
| C | 2.491692181  | 0.191833013  | -0.168943012 |
| H | 4.907729351  | 2.366447171  | 0.848661060  |
| H | 2.485275177  | 2.192628156  | 0.607995046  |
| H | 2.889981211  | -1.800668129 | -0.860850060 |
| H | 5.325590382  | -1.660357120 | -0.551315041 |
| H | 0.737521052  | -1.789300126 | 0.529907037  |
| H | 0.893313062  | 2.047632145  | -1.330853095 |
| H | -1.680217121 | -1.870615132 | 0.148873012  |
| H | -1.527513109 | 1.976666142  | -1.669743121 |
| O | -3.077574222 | 0.030204003  | -1.075567078 |
| H | -3.577506258 | -0.557873039 | -0.502455036 |
| N | 6.676230483  | 0.470123031  | 0.263327018  |
| O | 7.441570537  | -0.553115042 | 0.228619018  |
| O | 7.204280521  | 1.361904099  | 1.071750075  |
| C | -4.908218353 | 0.686307051  | -4.110939299 |
| O | -4.951305357 | 1.314869095  | -2.859326205 |
| H | -4.202458302 | 1.044660073  | -2.334206169 |
| H | -5.807448417 | 0.957988069  | -4.646355336 |
| H | -4.048391294 | 1.013111071  | -4.689071338 |

|      |              |              |              |
|------|--------------|--------------|--------------|
| H    | -4.875759351 | -0.395614028 | -4.021369292 |
| C    | -7.608045546 | 1.509885109  | -0.351315023 |
| O    | -6.764513489 | 0.490640038  | -0.819963058 |
| H    | -6.276041453 | 0.802664058  | -1.578930114 |
| H    | -8.305795599 | 1.827264133  | -1.118368082 |
| H    | -8.173055588 | 1.116198080  | 0.481365037  |
| H    | -7.044983506 | 2.373337170  | -0.010961002 |
| C    | -5.505520394 | -2.551605185 | 0.645629047  |
| O    | -4.976564357 | -1.263813090 | 0.449173031  |
| H    | -5.670140409 | -0.674752047 | 0.151380011  |
| H    | -5.989134429 | -2.926082212 | -0.251433019 |
| H    | -4.689203336 | -3.211817230 | 0.900898067  |
| H    | -6.220658445 | -2.561757186 | 1.460504103  |
| S1T2 |              |              |              |
| C    | 4.497407323  | 1.442674105  | 0.458267032  |
| C    | 3.139757227  | 1.356130098  | 0.304397020  |
| C    | 3.333851240  | -0.901741067 | -0.484958034 |
| C    | 4.716495341  | -0.841765060 | -0.317226023 |
| C    | 5.290096379  | 0.333030023  | 0.154591010  |
| C    | 1.043734077  | 0.142338012  | -0.376703027 |
| C    | 0.286220020  | -0.963303072 | -0.001430001 |

|   |              |              |              |
|---|--------------|--------------|--------------|
| C | 0.359998028  | 1.231401089  | -0.955692069 |
| C | -1.100478081 | -0.996829070 | -0.200859015 |
| C | -0.993640073 | 1.206914089  | -1.146462081 |
| C | -1.735090124 | 0.078837006  | -0.770273055 |
| C | 2.518210179  | 0.191775015  | -0.183442013 |
| H | 4.941578354  | 2.352702168  | 0.816540059  |
| H | 2.533742182  | 2.200181156  | 0.576831041  |
| H | 2.894954207  | -1.807739128 | -0.861435060 |
| H | 5.334831383  | -1.688573121 | -0.538416038 |
| H | 0.761377056  | -1.807495129 | 0.463674033  |
| H | 0.912892065  | 2.099245152  | -1.268119089 |
| H | -1.666220118 | -1.859288136 | 0.106868007  |
| H | -1.507518110 | 2.047844150  | -1.576183112 |
| O | -3.062352222 | 0.098567004  | -1.026192073 |
| H | -3.563135259 | -0.499687037 | -0.463670032 |
| N | 6.690987480  | 0.425250028  | 0.277695022  |
| O | 7.469034540  | -0.532380036 | 0.131311011  |
| O | 7.167586514  | 1.293893091  | 1.206499087  |
| C | -4.819016347 | 0.791795059  | -4.091633293 |
| O | -4.908087356 | 1.399039102  | -2.832286206 |
| H | -4.175416303 | 1.124304081  | -2.287045162 |

|   |              |              |              |
|---|--------------|--------------|--------------|
| H | -5.683630407 | 1.096476078  | -4.664954334 |
| H | -3.924763280 | 1.106076078  | -4.622523330 |
| H | -4.817845346 | -0.292128019 | -4.021337287 |
| C | -7.642579552 | 1.413485101  | -0.385118030 |
| O | -6.764974487 | 0.438370031  | -0.885234066 |
| H | -6.270396450 | 0.798799058  | -1.618127114 |
| H | -8.348878602 | 1.732341122  | -1.143471082 |
| H | -8.196047588 | 0.973815072  | 0.432343030  |
| H | -7.107078514 | 2.282608164  | -0.016013999 |
| C | -5.429385393 | -2.540268181 | 0.671532046  |
| O | -4.956038355 | -1.231712086 | 0.468000036  |
| H | -5.661778408 | -0.685950052 | 0.119787007  |
| H | -5.810790420 | -2.973929212 | -0.248097017 |
| H | -4.602207332 | -3.140261226 | 1.022593075  |
| H | -6.212448445 | -2.561001182 | 1.421195102  |

S1T3

|   |             |              |             |
|---|-------------|--------------|-------------|
| C | 4.403425317 | 1.961515142  | 0.433350033 |
| C | 3.091182222 | 1.772621126  | 0.220539016 |
| C | 3.408071244 | -0.657033045 | 0.152576009 |
| C | 4.759415341 | -0.482479034 | 0.347496025 |
| C | 5.282979379 | 0.830891060  | 0.488549036 |



|   |              |              |              |
|---|--------------|--------------|--------------|
| C | 1.081099076  | 0.296009021  | -0.176530011 |
| C | 0.390108029  | -0.898697065 | 0.130751009  |
| C | 0.298173023  | 1.349557097  | -0.732057054 |
| C | -0.970362069 | -1.030296076 | -0.081043004 |
| C | -1.039603076 | 1.215142086  | -0.948951071 |
| C | -1.695971125 | 0.020385003  | -0.615222046 |
| C | 2.502923180  | 0.458693036  | 0.056037003  |
| H | 4.797291345  | 2.947555214  | 0.575657041  |
| H | 2.451746178  | 2.632838189  | 0.217876016  |
| H | 3.035434219  | -1.656130121 | 0.032461002  |
| H | 5.419062389  | -1.324183096 | 0.395844030  |
| H | 0.913096068  | -1.726034123 | 0.571663043  |
| H | 0.765862056  | 2.272252166  | -1.018517072 |
| H | -1.467271105 | -1.945621139 | 0.191701015  |
| H | -1.610182115 | 2.022815145  | -1.369733097 |
| O | -3.018796219 | -0.056359002 | -0.876996062 |
| H | -3.483879250 | -0.691365049 | -0.324351024 |
| N | 6.649110477  | 1.021815074  | 0.702870050  |
| O | 7.439972533  | 0.068538005  | 0.748307055  |
| O | 7.115815510  | 2.174657159  | 0.846647059  |
| C | -4.581110332 | 0.895176063  | -3.973043285 |

|   |              |              |              |
|---|--------------|--------------|--------------|
| O | -4.935361357 | 1.218897086  | -2.655345193 |
| H | -4.220944305 | 0.989906072  | -2.067109149 |
| H | -5.424070390 | 1.132563082  | -4.607278332 |
| H | -3.723929269 | 1.473126108  | -4.305338308 |
| H | -4.354354314 | -0.161293014 | -4.083285295 |
| C | -7.958860571 | 0.394866031  | -0.713211052 |
| O | -6.827266492 | -0.312166025 | -1.153915082 |
| H | -6.330271453 | 0.224329015  | -1.767332127 |
| H | -8.612456620 | 0.642552046  | -1.542720113 |
| H | -8.499484612 | -0.242998018 | -0.027984004 |
| H | -7.682548553 | 1.309216095  | -0.196618014 |
| C | -5.298654382 | -2.767161198 | 0.928473065  |
| O | -4.921058352 | -1.472987109 | 0.531153038  |
| H | -5.632361408 | -1.086485079 | 0.017916000  |
| H | -5.440454390 | -3.422520248 | 0.074809005  |
| H | -4.508369325 | -3.166981227 | 1.547640112  |
| H | -6.214805449 | -2.746491196 | 1.508714108  |
